# Supplementary material
Source: PubMed Central journal article supplement (PMC3899836)
Supplement: NIHMS539362-supplement-Supp_Table_S1___Fig_S1-S2.pdf [file NIHMS539362-supplement-Supp_Table_S1___Fig_S1-S2.pdf]

## Assessment of coyote-wolf-dog admixture using ancestry-informative diagnostic SNPs

J. Monzón, R. Kays, and D. E. Dykhuizen

### Supporting information

**Table S1.** Populations of 538 wild and domestic canids whose genotypes at 63 ancestry-informative SNPs were analyzed in this study. Populations in bold type served as reference parental populations to assess the ancestry of the other admixed populations. N = sample size.

| <b>Population</b>                | <b>N</b> | <b>Sampling Region* or Breed</b>                                                                                                                                            | <b>Reference</b>                  |
|----------------------------------|----------|-----------------------------------------------------------------------------------------------------------------------------------------------------------------------------|-----------------------------------|
| <b>Western/Midwestern coyote</b> | 41       | California (12), Manitoba (5), Illinois (5), Washington (4), Utah (3), Ohio† (3), Louisiana (3), Alaska (2), Alabama (2), Mississippi (2)                                   | vonHoldt <i>et al.</i> (2011)     |
| <b>Western wolf</b>              | 34       | Western Canada (15), Wyoming (7), Northern Quebec (6), Alaska (4), Minnesota‡ (1), Ontario‡ (1)                                                                             | vonHoldt <i>et al.</i> (2011)     |
| <b>Eastern/Great Lakes wolf</b>  | 17       | Minnesota (10), Wisconsin (4), Ontario (3)                                                                                                                                  | vonHoldt <i>et al.</i> (2011)     |
| <b>Dog</b>                       | 10       | Rottweiler, Australian Shepherd, Border Collie, Golden Retriever, Labrador Retriever, Giant Schnauzer, German Shepherd, Old English Sheepdog, Doberman Pinscher, Collie     | vonHoldt <i>et al.</i> (2011)     |
| Northeastern coyote              | 9        | New York (5), Vermont (2), New Hampshire (1), Southern Quebec (1)                                                                                                           | vonHoldt <i>et al.</i> (2011)     |
| Ohio coyote                      | 23       | Ohio                                                                                                                                                                        | Monzón <i>et al.</i> (this study) |
| Contact zone coyote              | 167      | Pennsylvania (88), New York (79)                                                                                                                                            | Monzón <i>et al.</i> (this study) |
| Northeast zone coyote            | 237      | New York (110), Pennsylvania (25), Vermont (24), Southern Quebec (21), Maine (20), New Jersey (14), Massachusetts (7), Connecticut (7), New Hampshire (5), Rhode Island (4) | Monzón <i>et al.</i> (this study) |

\* Sample size per region indicated in parentheses

† One of the Ohio coyotes genotyped by vonHoldt *et al.* was known to have wolf and dog ancestry and was not included as a reference individual

‡ Two wolves from the Great Lakes region had genetic profiles of western gray wolves, as determined from principal component and Bayesian analyses

Assessment of coyote-wolf-dog admixture using ancestry-informative diagnostic SNPs  
J. Monzón, R. Kays, and D. E. Dykhuizen  
Supporting information

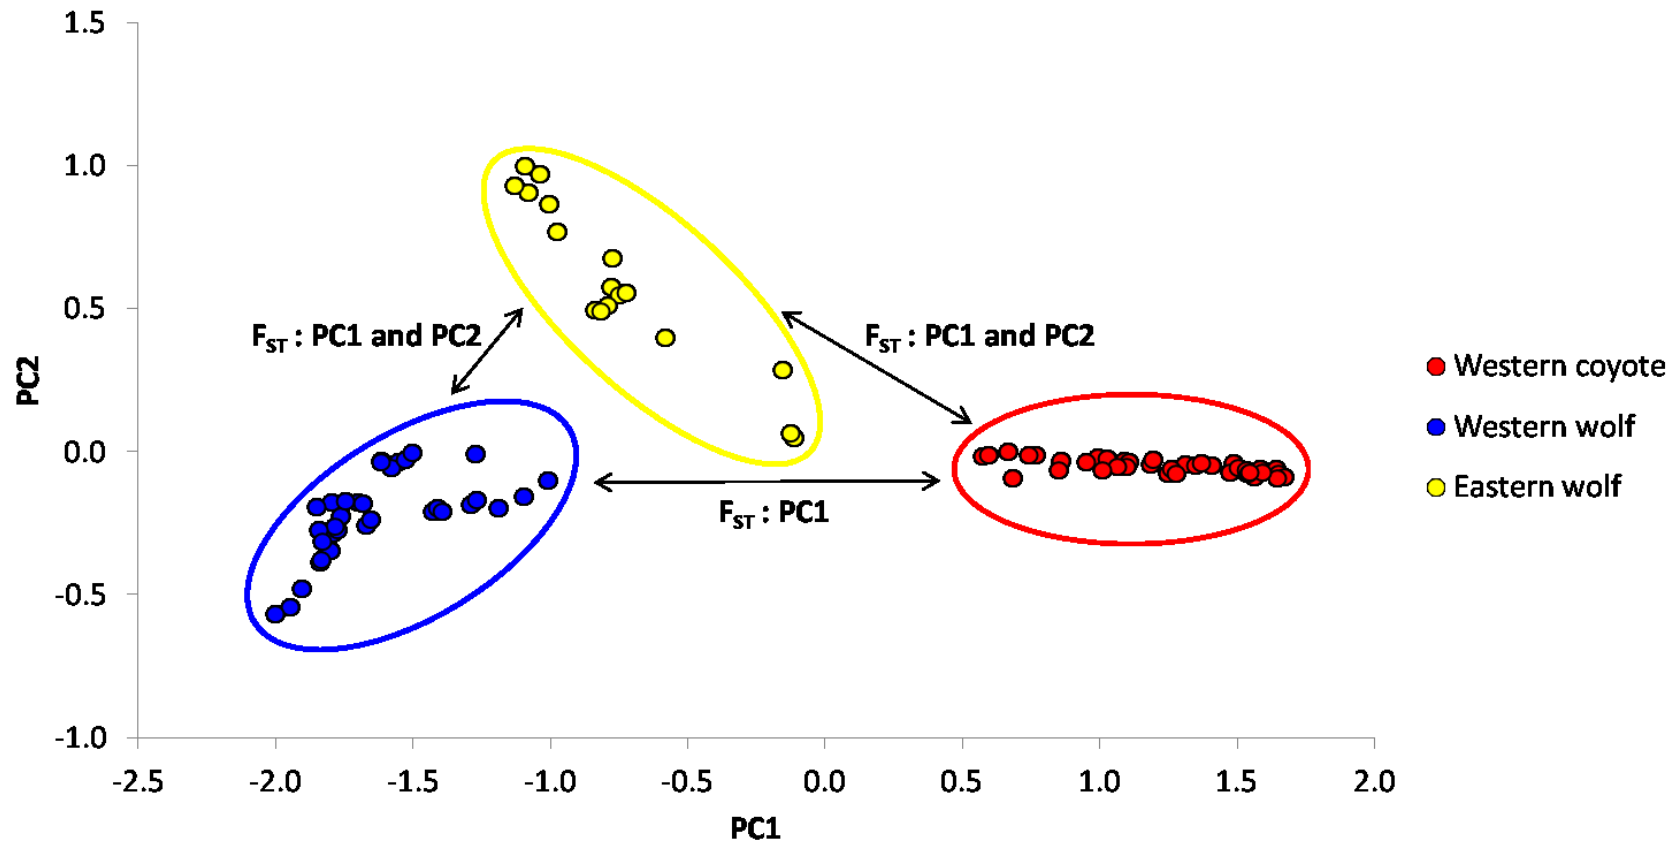

**Figure S1.** Principal component analysis of initial reference populations of western coyote, western wolf, and eastern wolf genotyped at 60,584 SNPs (vonHoldt *et al.* 2011). Arrow labels indicate how pairwise per-locus  $F_{ST}$  estimates were compared to per-locus contributions to the first or second principal component. An initial set of 138 candidate ancestry-informative SNPs was selected because they were present both in the top 1% of loci loading the principal component that separates each pair of source populations and in the top 1% of an analogous  $F_{ST}$  comparison. From this set, 63 ancestry-informative SNPs were selected: 21 SNPs diagnostic between western coyote and western wolf, 21 diagnostic between western coyote and eastern wolf, and 21 diagnostic between western wolf and eastern wolf (Table 1).

Assessment of coyote-wolf-dog admixture using ancestry-informative diagnostic SNPs  
J. Monzón, R. Kays, and D. E. Dykhuizen  
Supporting information

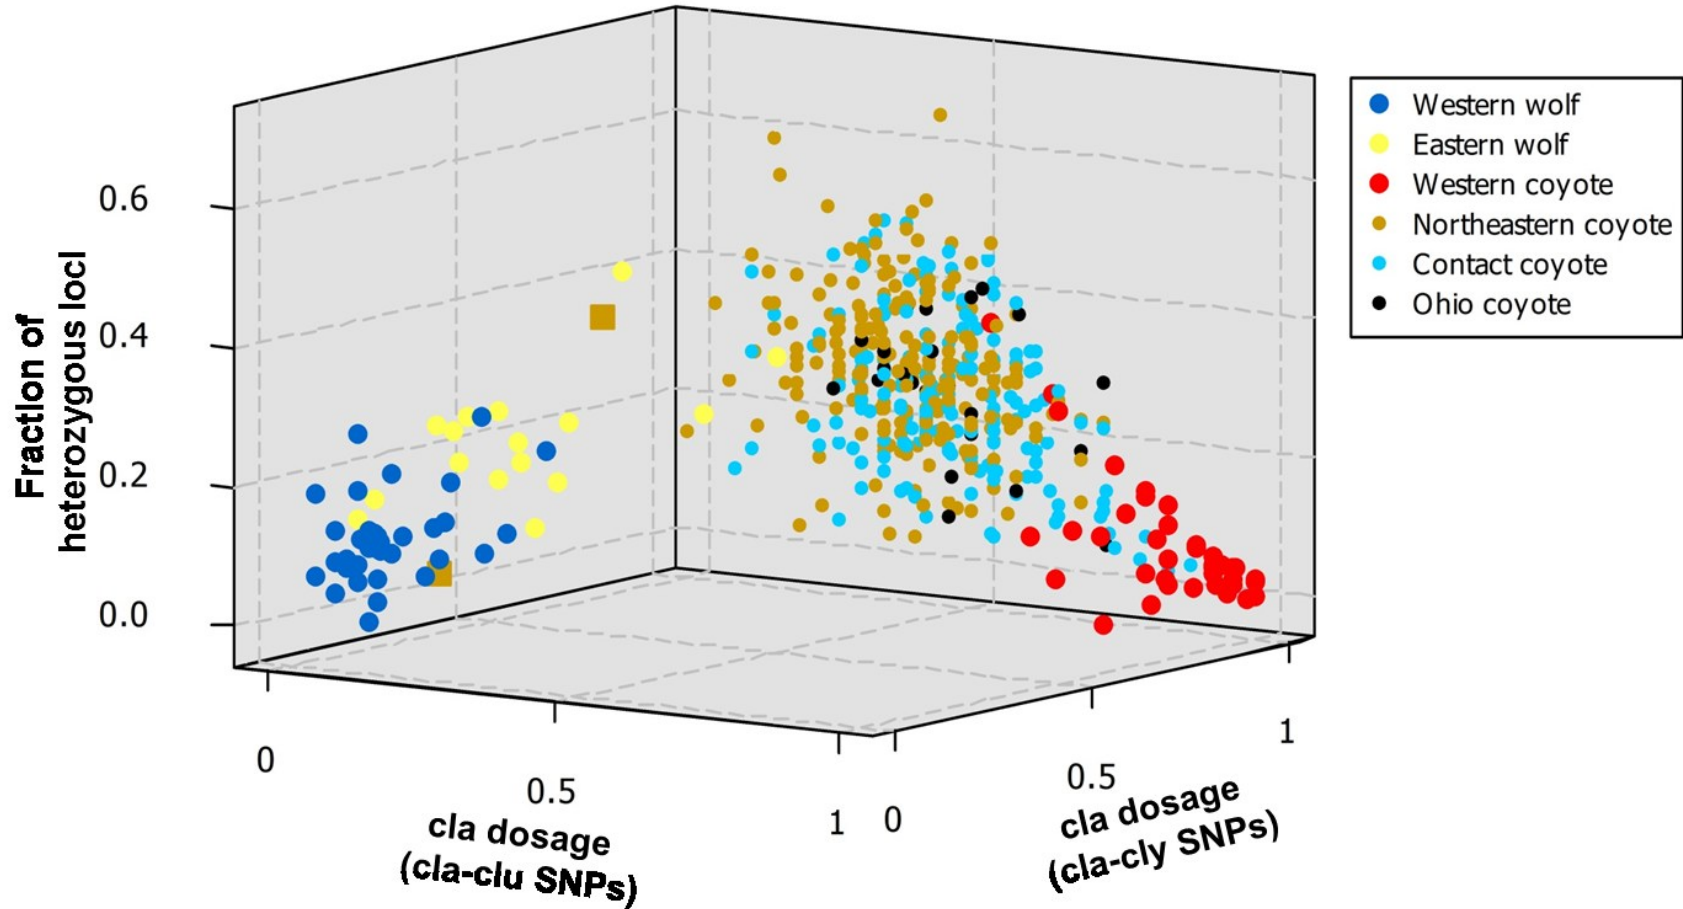

**Figure S2.** Plot of dosage of coyote alleles and observed heterozygosity. Dosage was calculated in PLINK for the set of 21 SNPs diagnostic between western coyote and western wolf (cla-clu) and separately for the set of 21 SNPs diagnostic between western coyote and eastern wolf (cla-cly). The vertical axis is the fraction of 42 SNPs that are in the heterozygous state.
